# Supplementary material for: Novel Strigolactone Mimics That Modulate Photosynthesis and Biomass Accumulation in Chlorella sorokiniana
Source: MDPI journal article supplement (doi:10.3390/molecules28207059), 2023-10-12
Supplement: s1 [file s1]

## Supplementary Material

### Novel strigolactone mimics that modulate photosynthesis and biomass accumulation in *Chlorella sorokiana*

by Daria Gabriela Popa, Florentina Georgescu, Florea Dumitrascu, Sergiu Shova, Diana Constantinescu-Aruxandei, Constantin Draghici, Lucian Vladulescu, Florin Oancea

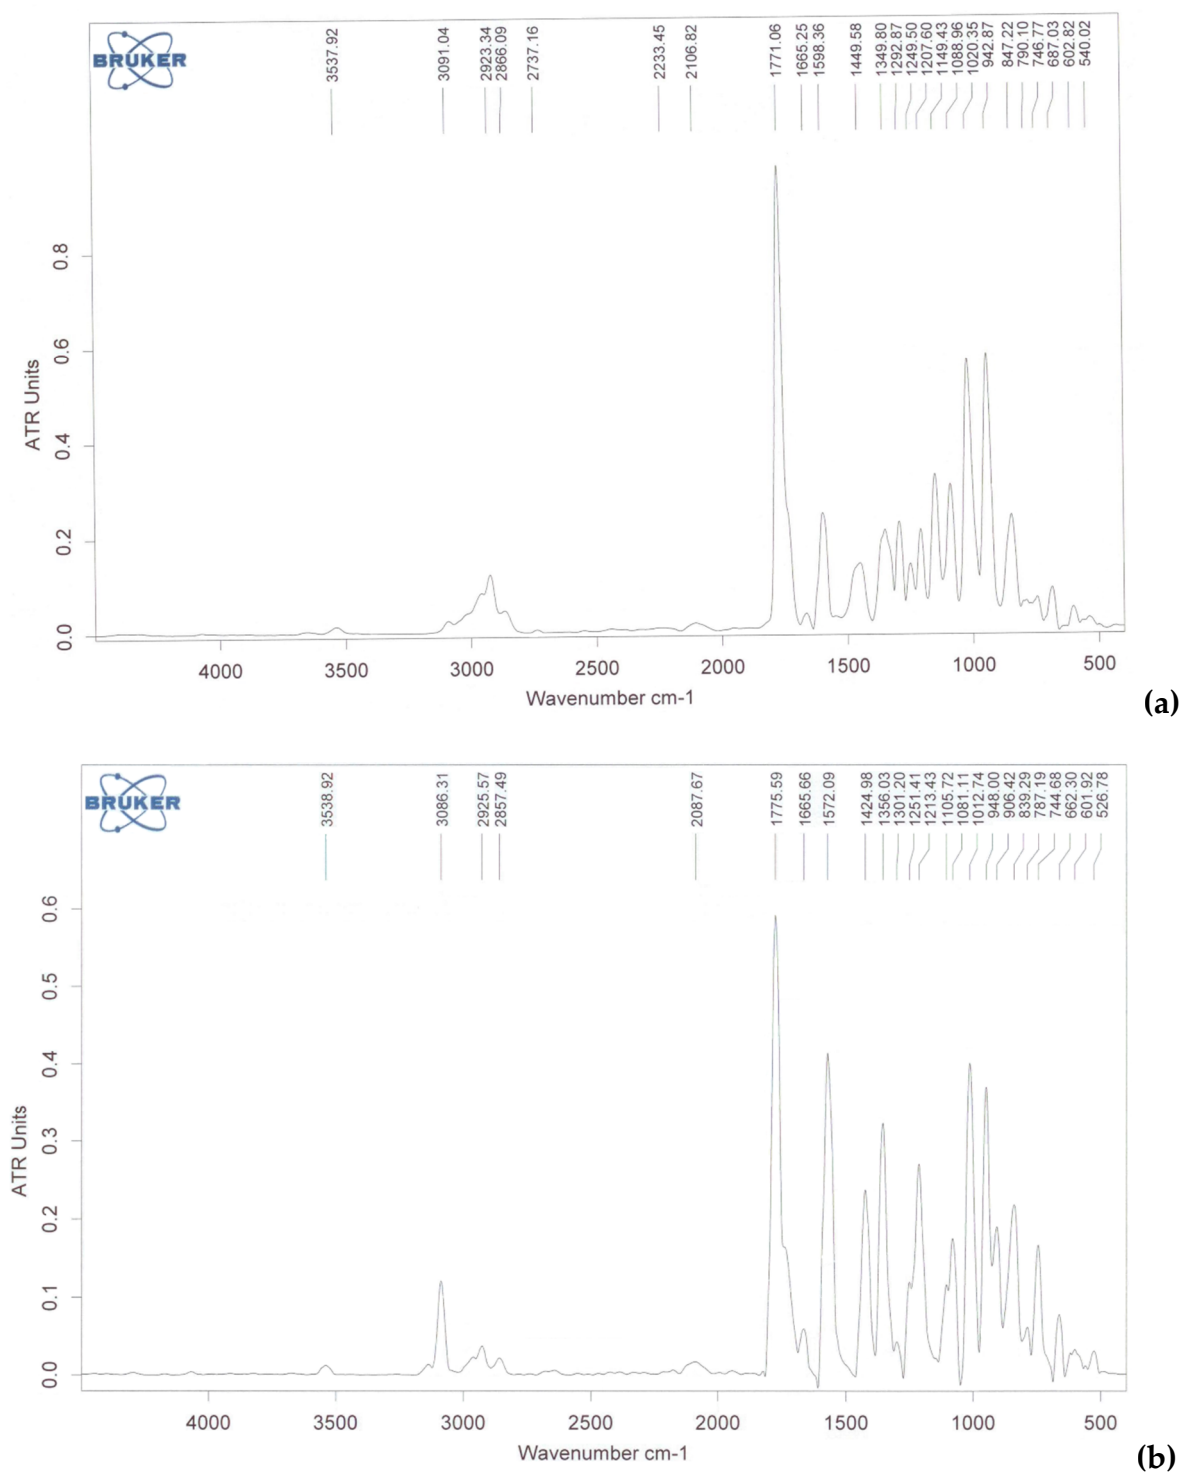

**Figure S1.** IR spectrum of (a) compound 3 (SL-F1) and (b) compound 4 (SL-F2)

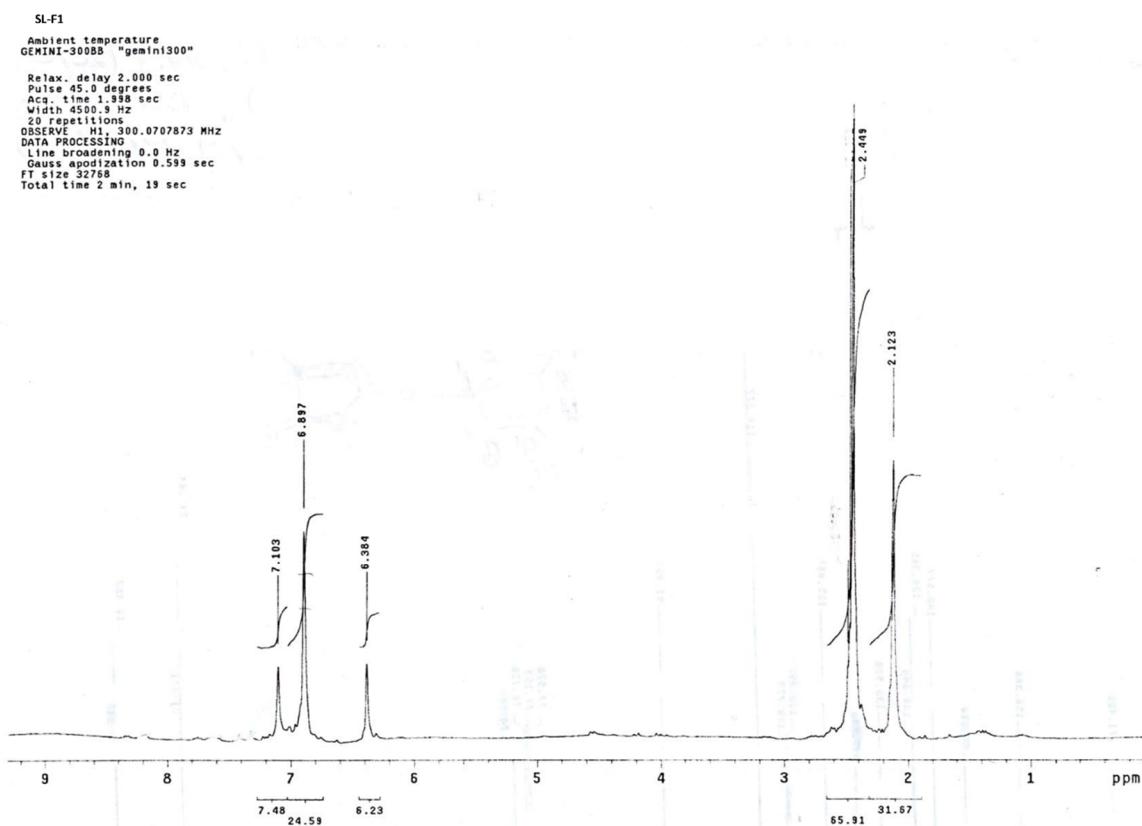

(a)

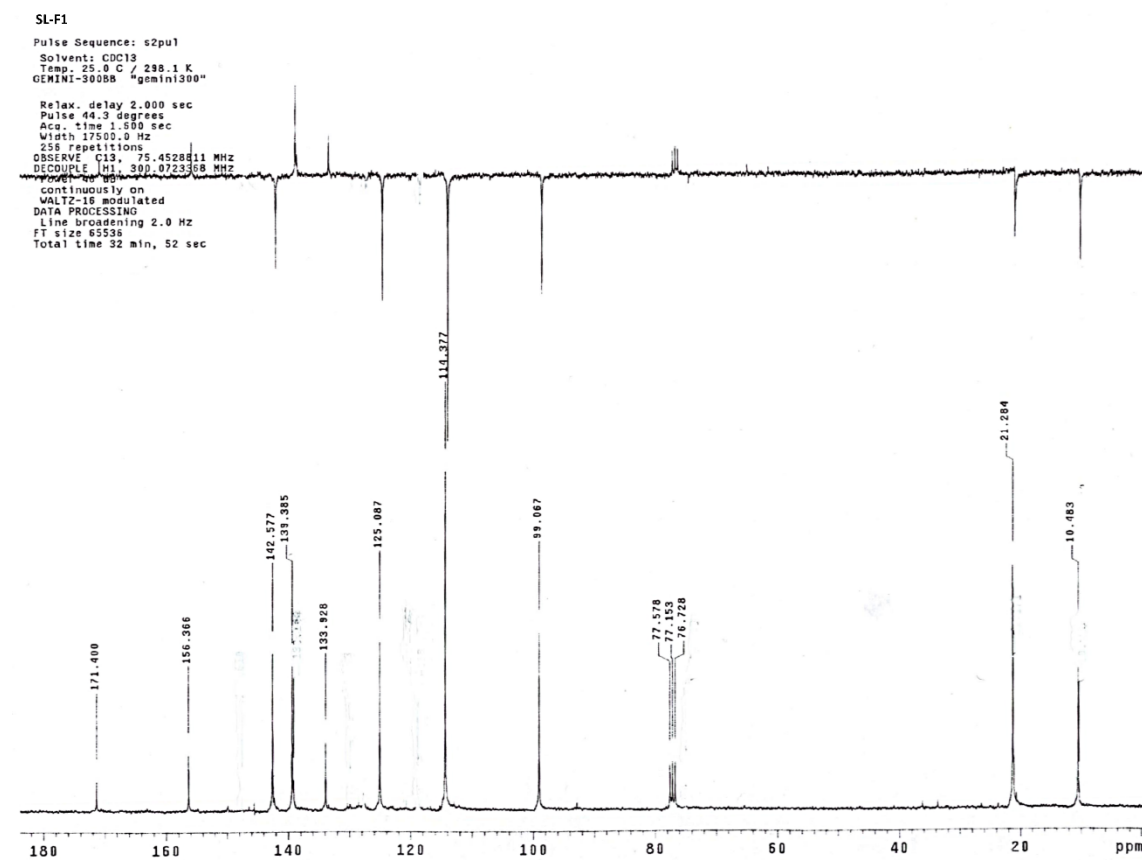

(b)

**Figure S2.** (a) The  $^1\text{H}$  NMR spectrum for compound 3 (SL-F1), recorded in  $\text{CDCl}_3$ ; (b) The  $^{13}\text{C}$  NMR spectrum for compound 3 (SL-F1), recorded in  $\text{CDCl}_3$ .

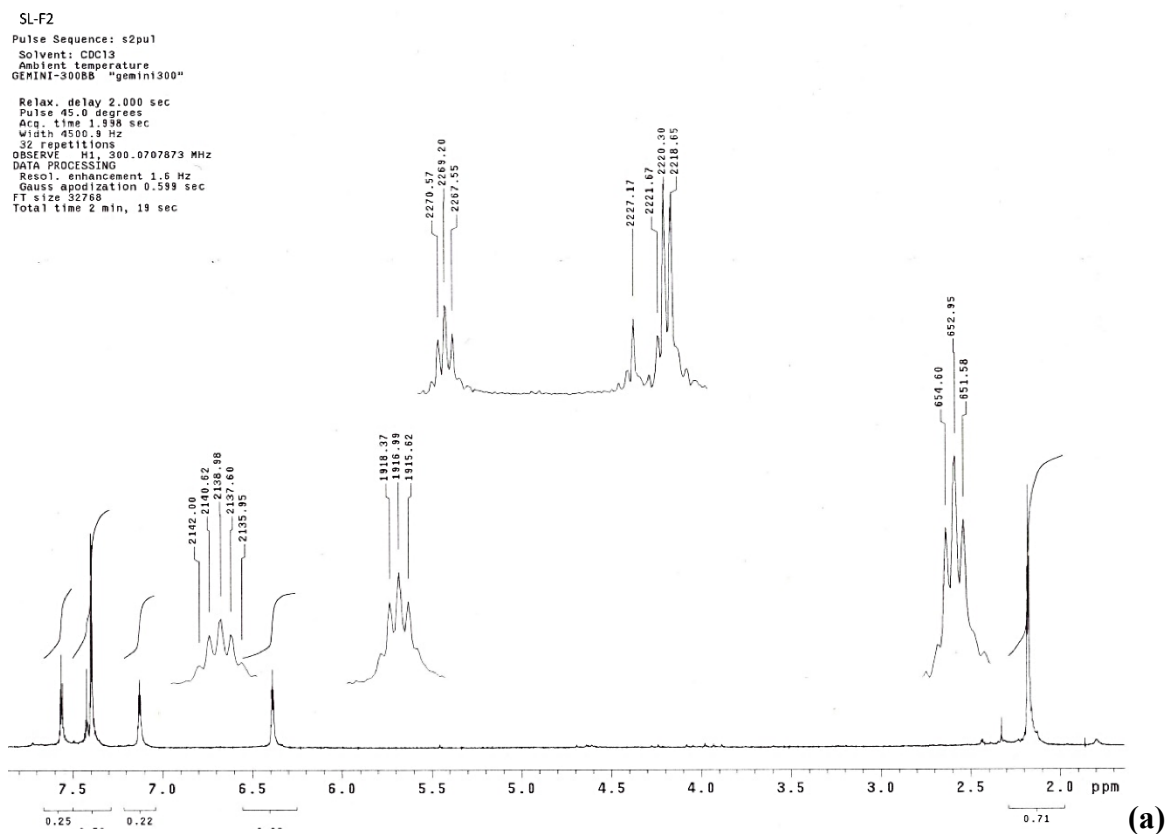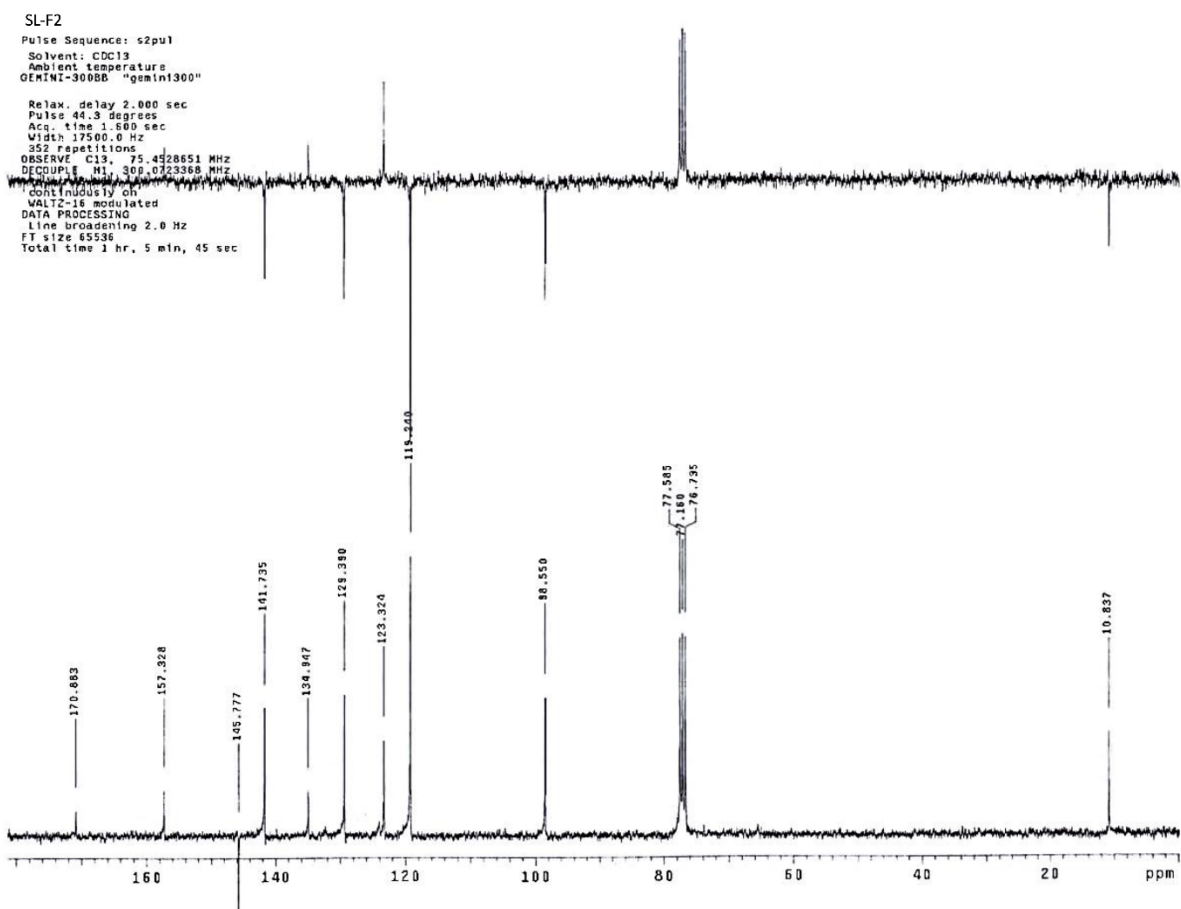

**Figure S3.** (a) The <sup>1</sup>H NMR spectrum for compound **4** (SL-F2) recorded in CDCl<sub>3</sub>; (b) The <sup>13</sup>C NMR spectrum for compound **4** (SL-F2) recorded in CDCl<sub>3</sub>.

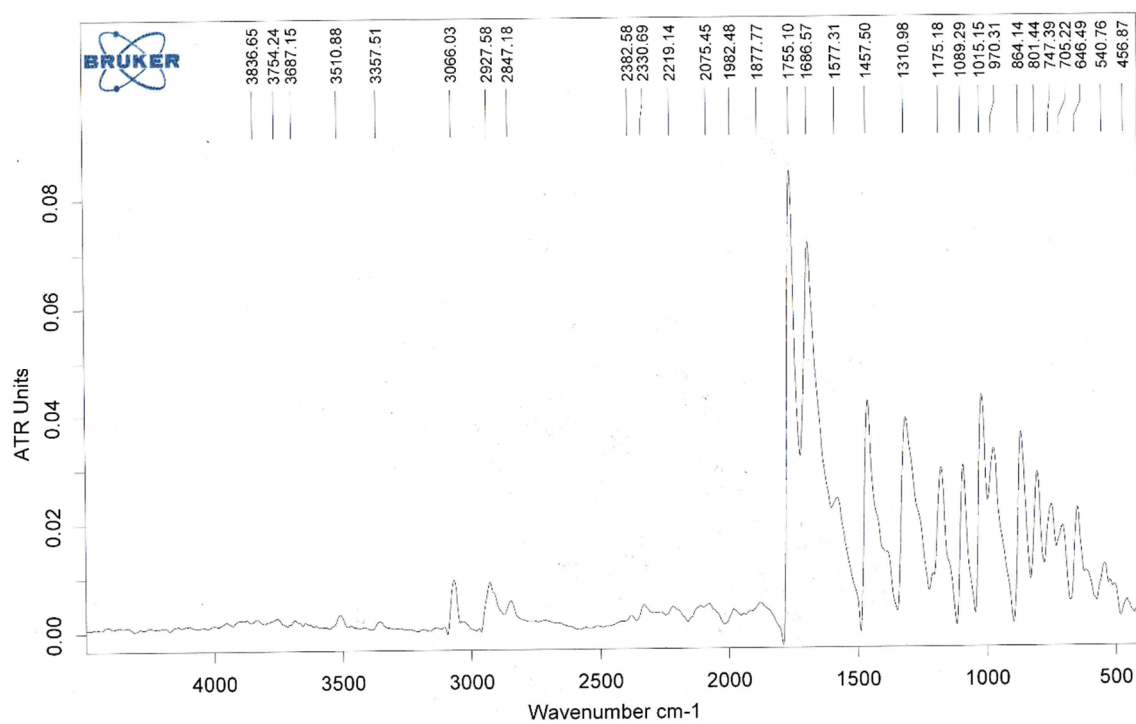

(a)

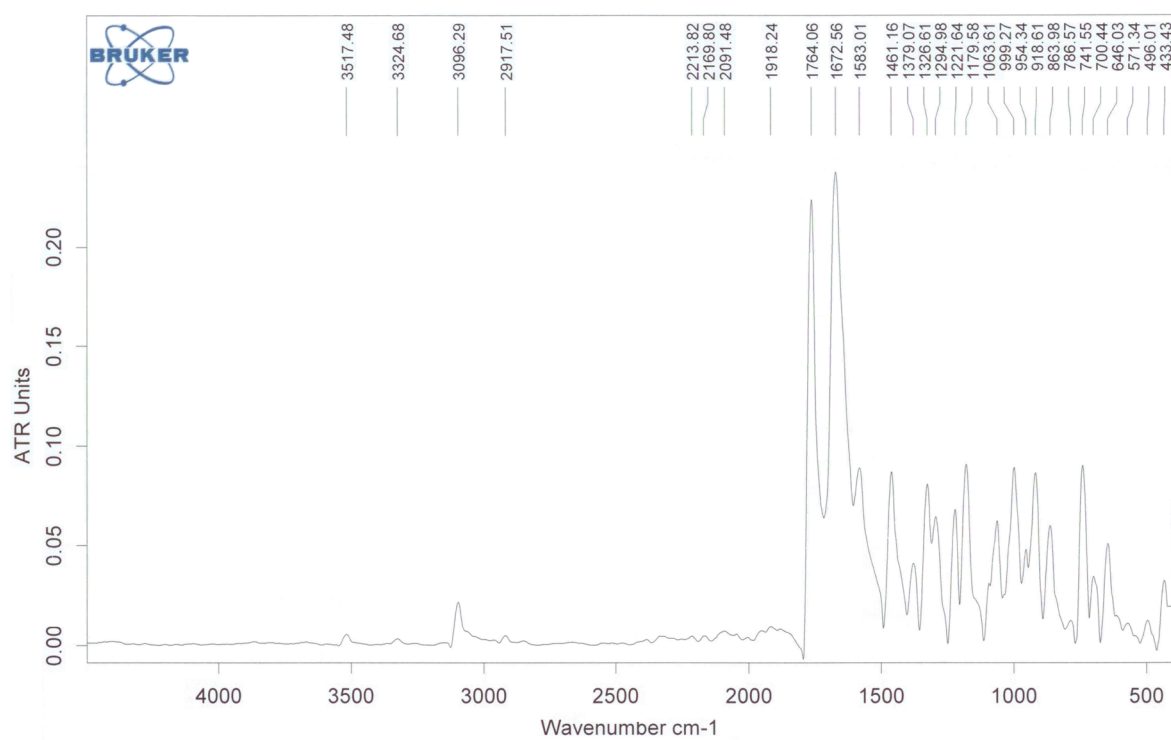

(b)

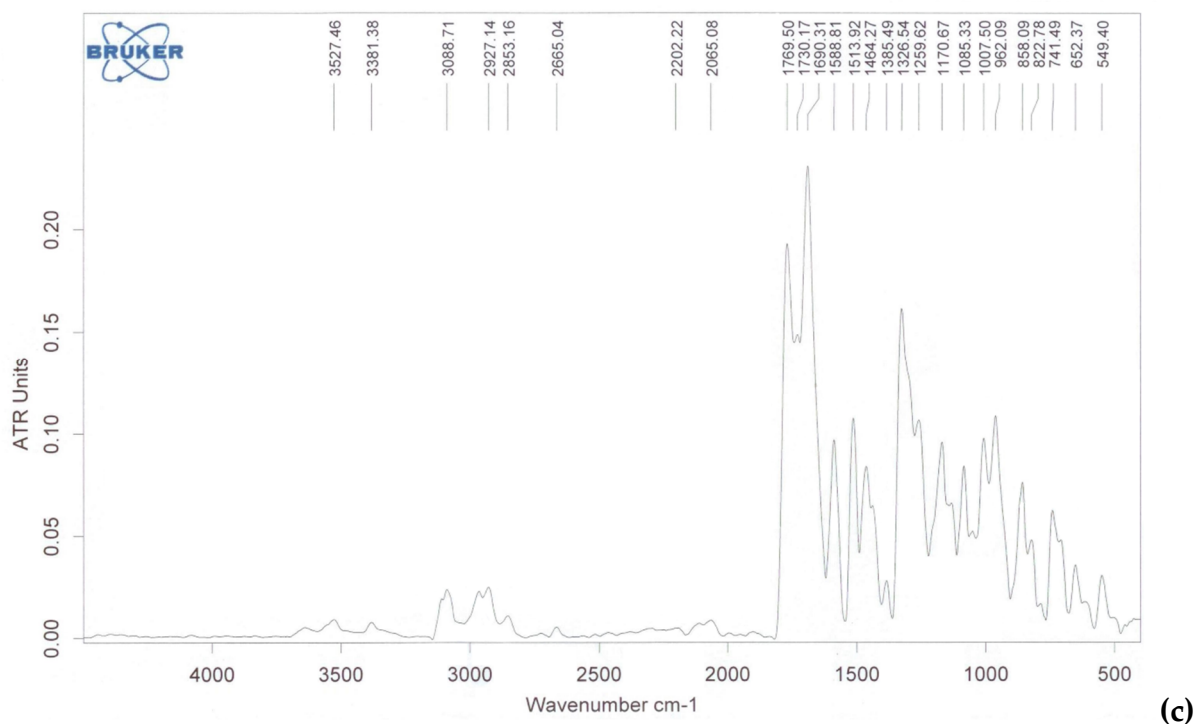

**Figure S4.** (a) IR spectrum of (a) compound **7** (SL-F3); (b) IR spectrum of (a) compound **9** (SL-F5); (c) IR spectrum of (a) compound **11** (SL-F6).

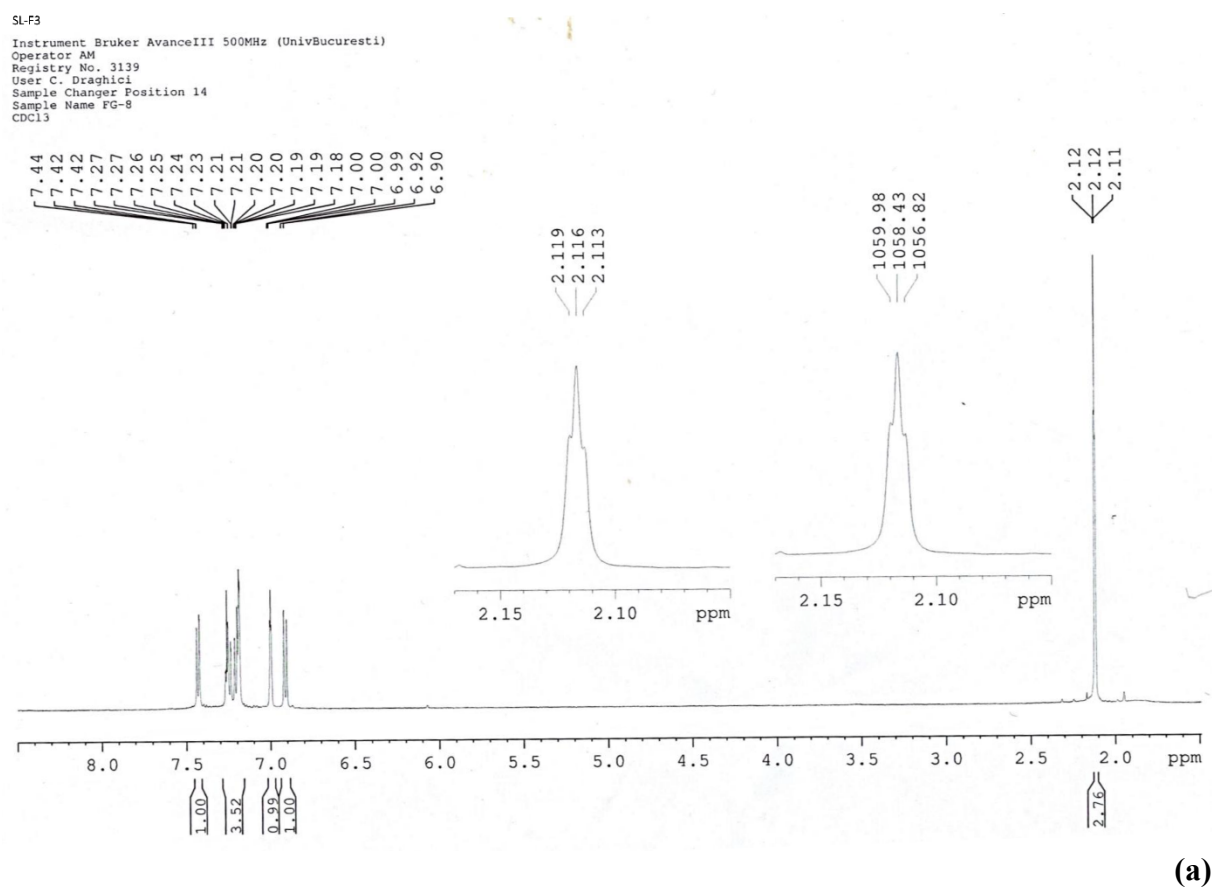

SL-F3  
Instrument: Bruker AvanceIII 500MHz (UnivBucuresti)  
Operator: AM  
Registry No.: 3139  
User: C. Draghici  
Sample Changer Position: 14

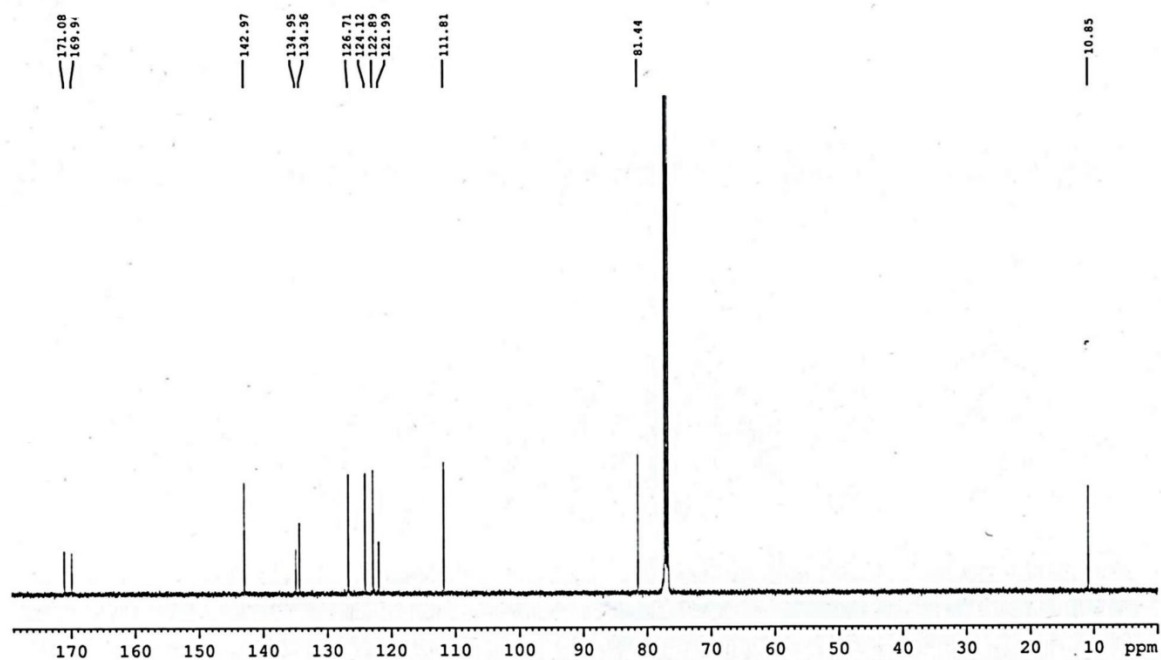

(b)

**Figure S5.** (a) The  $^1\text{H}$  NMR spectrum for compound 7 (SL-F3) recorded in  $\text{CDCl}_3$ ; (b) The  $^{13}\text{C}$  NMR spectrum for compound 7 (SL-F3) recorded in  $\text{CDCl}_3$ .

SL-F5

Pulse Sequence: s2pu1

Solvent: CDCl<sub>3</sub>

Ambient temperature

GEMINI-300BB "gemin300"

Relax. delay 2.000 sec

Pulse 45.0 degrees

Acq. time 1.998 sec

Width 4500.9 Hz

4 repetitions

OBSERVE H1, 300.0707873 MHz

DATA PROCESSING

Line broadening 0.1 Hz

Gauss apodization 0.599 sec

FT size 32768

Total time 0 min, 17 sec

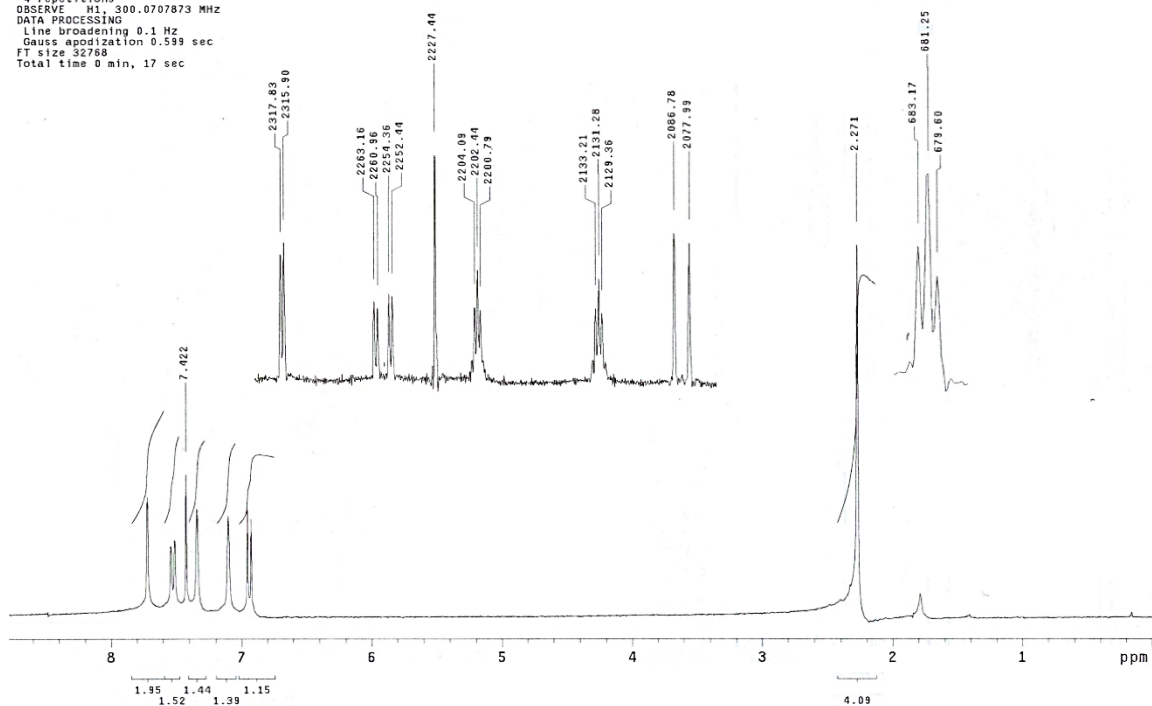

(a)

SL-F5

Pulse Sequence: s2pu1

Solvent: CDCl<sub>3</sub>

Ambient temperature

GEMINI-300BB "gemin300"

Relax. delay 2.000 sec

Pulse 45.0 degrees

Acq. time 1.600 sec

Width 17500.0 Hz

1040 repetitions

OBSERVE C13, 75.4528635 MHz

WALTZ-16

continuously on

WALTZ-16 modulated

DATA PROCESSING

Line broadening 2.0 Hz

FT size 65536

Total time 2 hr, 11 min, 30 sec

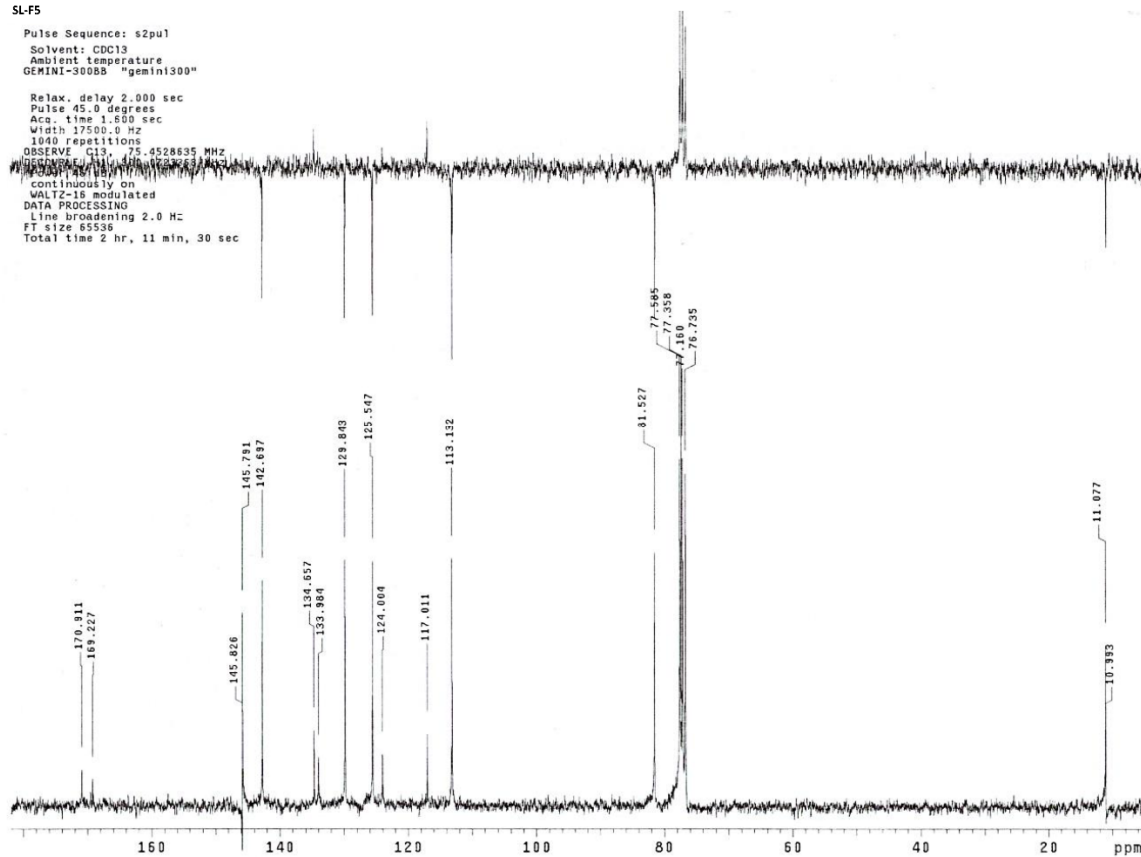

(b)

**Figure S6.** (a) The <sup>1</sup>H NMR spectrum for compound **9** (SL-F5) recorded in CDCl<sub>3</sub>. (b) The <sup>13</sup>C NMR spectrum for compound **9** (SL-F5) recorded in CDCl<sub>3</sub>.

SL-F6

Instrument: Bruker AvanceIII 500MHz (UnivBucuresti)  
Operator: AM  
Registry No.: 3004  
User: C. Draghici  
Sample Changer Position: 12

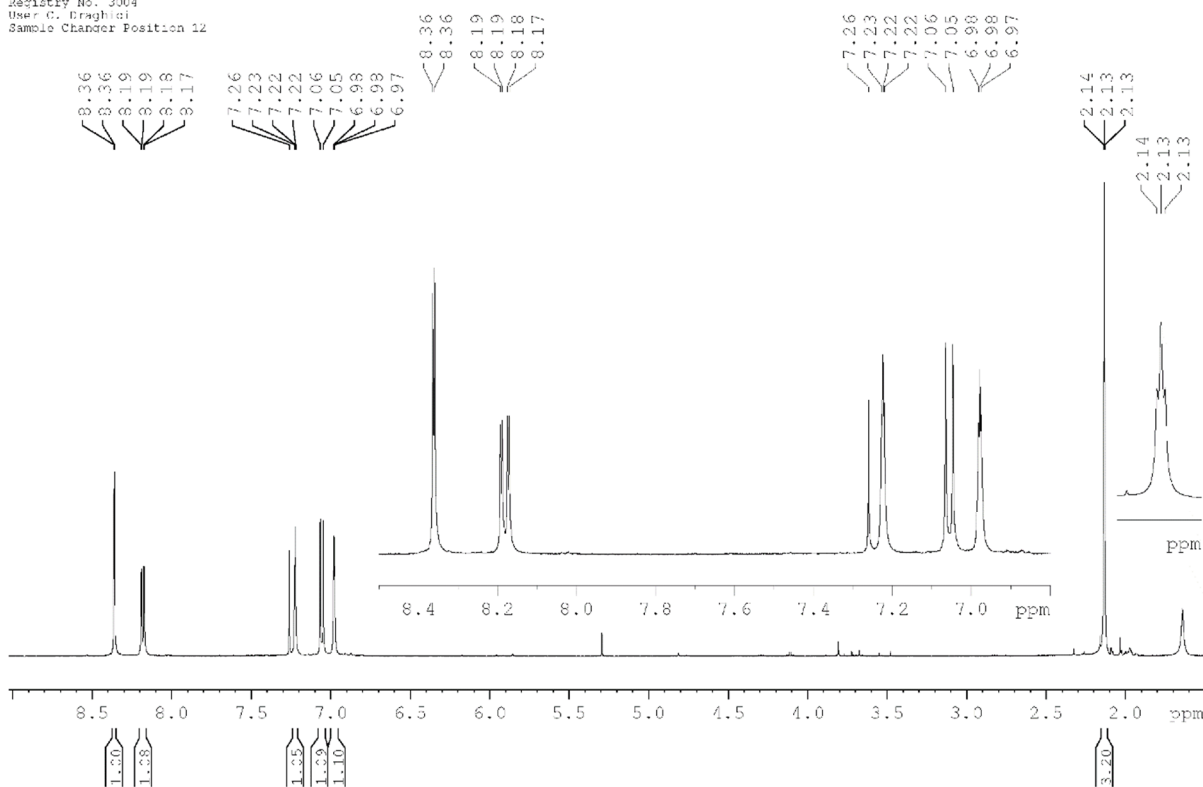

(a)

Instrument: Bruker AvanceIII 500MHz (UnivBucuresti)  
Operator: AM  
Registry No.: 3004  
User: C. Draghici  
Sample Changer Position: 12  
Sample Name: FG-14  
CDCl3  
@C13-CPD-BBOF-34

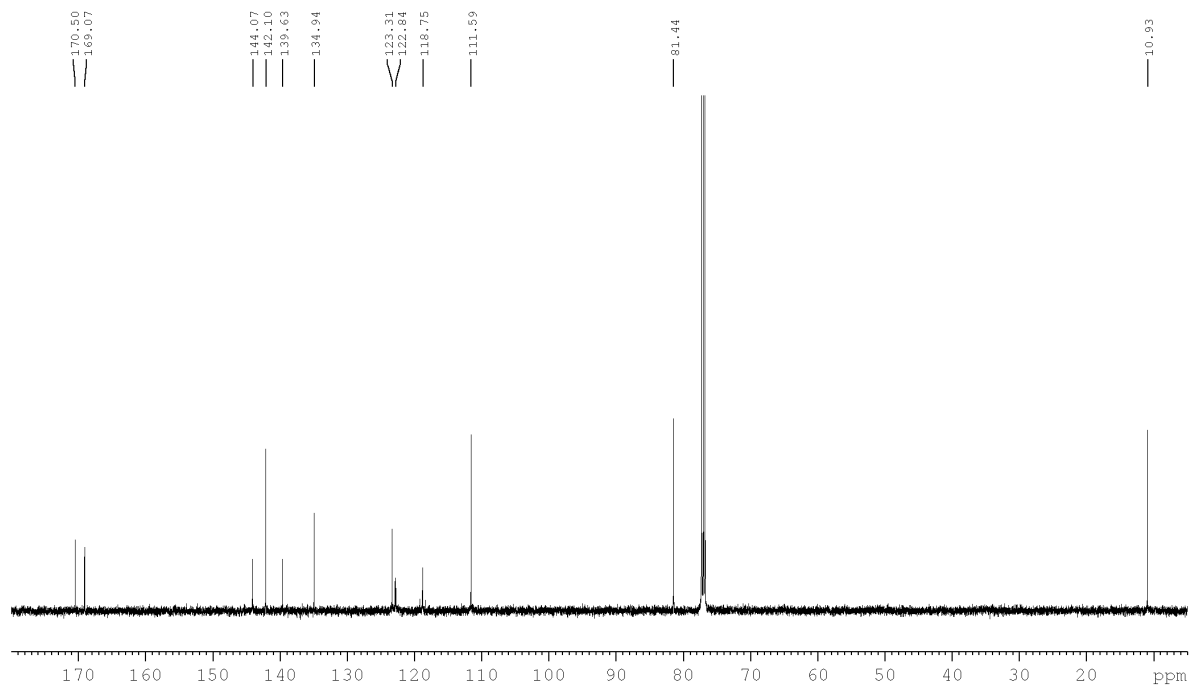

(b)

**Figure S7.** (a) The  $^1\text{H}$  NMR spectrum for compound **11** (SL-F6) recorded in  $\text{CDCl}_3$ . (b) The  $^{13}\text{C}$  NMR spectrum for compound **11** (SL-F6) recorded in  $\text{CDCl}_3$ .



# Crystallographic data

**Table S1.** Crystal data and details of data collection.

|                                                 | 7 [SL-FL3]                                       | 8                                       |
|-------------------------------------------------|--------------------------------------------------|-----------------------------------------|
| empirical formula                               | C <sub>12</sub> H <sub>9</sub> NO <sub>3</sub> S | C <sub>7</sub> H <sub>4</sub> BrNOS     |
| <i>FW</i>                                       | 247.26                                           | 230.08                                  |
| space group                                     | <i>I</i> 2/ <i>a</i>                             | <i>C</i> 2/ <i>c</i>                    |
|                                                 | 28.065(2)                                        | 16.8477(14)                             |
| <i>b</i> [Å]                                    | 4.0890(3)                                        | 3.9602(3)                               |
| <i>c</i> [Å]                                    | 18.9725(13)                                      | 23.005(3)                               |
| $\alpha$ [°]                                    | 90                                               | 90                                      |
| $\beta$ [°]                                     | 94.700(6)                                        | 98.437(10)                              |
| $\gamma$ [°]                                    | 90                                               | 90                                      |
| <i>V</i> [Å <sup>3</sup> ]                      | 2169.9(3)                                        | 1518.3(3)                               |
| <i>Z</i>                                        | 8                                                | 8                                       |
| <i>r</i> <sub>calcd</sub> [g cm <sup>-3</sup> ] | 1.514                                            | 2.013                                   |
| Crystal size [mm]                               | 0.35 × 0.05 × 0.05                               | 0.40 × 0.10 × 0.02                      |
| <i>T</i> [K]                                    | 293                                              | 293                                     |
| $\mu$ [mm <sup>-1</sup> ]                       | 0.292                                            | 5.620                                   |
| 2 $\Theta$ range [°]                            | 4.308 to 59.116                                  | 3.58 to 57.986                          |
| Reflections collected                           | 9289                                             | 4178                                    |
| Independent reflections                         | 2636 [ <i>R</i> <sub>int</sub> =0.0413]          | 1717 [ <i>R</i> <sub>int</sub> =0.0368] |
| Data/restraints/parameters                      | 2636/0/155                                       | 1717/0/100                              |
| <i>R</i> <sub>1</sub> <sup>[a]</sup>            | 0.0505                                           | 0.0538                                  |
| <i>wR</i> <sub>2</sub> <sup>[b]</sup>           | 0.1203                                           | 0.1075                                  |
| GOF <sup>[c]</sup>                              | 1.029                                            | 1.076                                   |
| Largest diff. peak/hole [e Å <sup>-3</sup> ]    | 0.24/-0.36                                       | 0.34/-0.69                              |
| CCDC                                            | 2109012                                          | 2109011                                 |

<sup>a</sup>  $R_1 = \sum ||F_o| - |F_c|| / \sum |F_o|$ , <sup>b</sup>  $wR_2 = \{\sum [w(F_o^2 - F_c^2)^2] / \sum [w(F_o^2)^2]\}^{1/2}$ , <sup>c</sup>  $GOF = \{\sum [w(F_o^2 - F_c^2)^2] / (n - p)\}^{1/2}$ , where *n* is the number of reflections and *p* is the total number of parameters refined.

**Table S2.** Bond distances (Å) and angles (°) of compound 8

| Bond   | Distance (Å) | Bond  | Distance (Å) | Bonds     | Angle (°) | Bonds    | Angle (°) |
|--------|--------------|-------|--------------|-----------|-----------|----------|-----------|
| Br1-C3 | 1.893(5)     | C1-C2 | 1.371(6)     | C1-S1-C7  | 91.4(2)   | C3-C4-C5 | 119.9(4)  |
| S1-C1  | 1.756(4)     | C1-C6 | 1.391(6)     | C7-N1-C6  | 115.4(4)  | C6-C5-C4 | 118.6(5)  |
| S1-C7  | 1.778(5)     | C2-C3 | 1.381(6)     | C2-C1-S1  | 128.7(3)  | C1-C6-N1 | 113.3(4)  |
| O1-C7  | 1.217(6)     | C3-C4 | 1.385(6)     | C2-C1-C6  | 121.1(4)  | C5-C6-N1 | 126.0(4)  |
| N1-C6  | 1.397(6)     | C4-C5 | 1.388(7)     | C6-C1-S1  | 110.2(4)  | C5-C6-C1 | 120.7(5)  |
| N1-C7  | 1.358(6)     | C5-C6 | 1.378(6)     | C1-C2-C3  | 118.0(4)  | O1-C7-S1 | 124.4(4)  |
|        |              |       |              | C2-C3-Br1 | 118.6(4)  | O1-C7-N1 | 125.9(5)  |
|        |              |       |              | C2-C3-C4  | 121.7(5)  | N1-C7-S1 | 109.7(4)  |
|        |              |       |              | C4-C3-Br1 | 119.7(4)  |          |           |

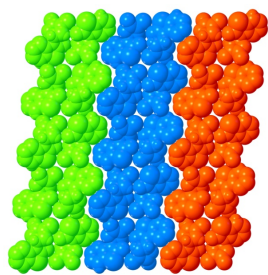

**Figure S8.** Space filling representation of the crystal structure **7** showing the packing of 2D layers.

**Table S3.** Bond distances (Å) and angles (°) of compound **7** (SL-F3)

| Bond    | Distance (Å) | Bonds     | Angle (°)  | Bonds       | Angle (°)  |
|---------|--------------|-----------|------------|-------------|------------|
| S1-C1   | 1.746(2)     | C1-S1-C7  | 91.82(11)  | O2-C8-C9    | 104.66(18) |
| S1-C7   | 1.764(2)     | C11-O2-C8 | 108.45(16) | N1-C8-C9    | 117.44(19) |
| O1-C7   | 1.212(3)     | C6-N1-C8  | 121.04(18) | C10-C9-C8   | 109.9(2)   |
| O2-C8   | 1.437(3)     | C7-N1-C6  | 114.77(19) | C9-C10-C11  | 107.9(2)   |
| O2-C11  | 1.374(3)     | C7-N1-C8  | 124.18(19) | C9-C10-C12  | 131.3(2)   |
| O3-C11  | 1.196(3)     | C2-C1-S1  | 128.10(19) | C11-C10-C12 | 120.8(2)   |
| N1-C6   | 1.409(3)     | C2-C1-C6  | 120.7(2)   | O2-C11-C10  | 108.80(19) |
| N1-C7   | 1.383(3)     | C6-C1-S1  | 111.17(17) | O3-C11-O2   | 120.7(2)   |
| N1-C8   | 1.443(3)     | C3-C2-C1  | 118.1(2)   | O3-C11-C10  | 130.5(2)   |
| C1-C2   | 1.379(3)     | C4-C3-C2  | 121.2(2)   |             |            |
| C1-C6   | 1.393(3)     | C3-C4-C5  | 121.2(2)   |             |            |
| C2-C3   | 1.379(4)     | C6-C5-C4  | 117.9(2)   |             |            |
| C3-C4   | 1.375(3)     | C1-C6-N1  | 112.4(2)   |             |            |
| C4-C5   | 1.383(3)     | C5-C6-N1  | 126.7(2)   |             |            |
| C5-C6   | 1.379(3)     | C5-C6-C1  | 120.9(2)   |             |            |
| C8-C9   | 1.491(3)     | O1-C7-S1  | 124.32(19) |             |            |
| C9-C10  | 1.320(3)     | O1-C7-N1  | 126.0(2)   |             |            |
| C10-C11 | 1.469(3)     | N1-C7-S1  | 109.71(16) |             |            |
| C10-C12 | 1.492(3)     | O2-C8-N1  | 109.37(16) |             |            |
